# Supplementary material for: Preparation of single-cell suspensions of mouse glomeruli for high-throughput analysis
Source: Springer Nature journal article supplement (doi:10.1038/s41596-021-00578-2), 2021-07-19
Supplement: MOESM1 [file 41596_2021_578_MOESM1_ESM8.pdf]

---

## Supplementary information

---

# Preparation of single-cell suspensions of mouse glomeruli for high-throughput analysis

---

In the format provided by the  
authors and unedited

**Supplementary Table 1: Enzymatic digestion buffers and level of dissociation of glomeruli to single-cells.**

Enzymatic digestion buffers A-E and Digestion Buffer II were tested under similar incubation conditions to determine and compare the level of dissociation. Appropriate institutional regulatory board permission was obtained for all animal experiments.

| Mix                 | Enzyme              | Concentration | Manufactur               | Cat. no.    | Dissociation level (+ to +++) |
|---------------------|---------------------|---------------|--------------------------|-------------|-------------------------------|
| A                   | Collagenase Type I  | 5 mg/ml       | Worthington              | LS004196    | +                             |
|                     | Pronase E           | 1 mg/ml       | Millipore Sigma          | P6911       |                               |
|                     | DNase I             | 50 U/ml       | Millipore Sigma          | D4527       |                               |
| B                   | Collagenase Type II | 5 mg/ml       | Worthington              | LS004176    | +                             |
|                     | Pronase E           | 1 mg/ml       | Millipore Sigma          | P6911       |                               |
|                     | DNase I             | 50 U/ml       | Millipore Sigma          | D4527       |                               |
| C                   | Collagenase Type IV | 5 mg/ml       | Worthington              | LS004188    | +                             |
|                     | Pronase E           | 1 mg/ml       | Millipore Sigma          | P6911       |                               |
|                     | DNase I             | 50 U/ml       | Millipore Sigma          | D4527       |                               |
| D                   | Trypsin Type IX-S   | 5 mg/ml       | Millipore Sigma          | T0303       | +                             |
|                     | Dispase II          | 2 U/ml        | Roche Applied Science    | 4942078001  |                               |
|                     | Collagenase D       | 2 U/ml        | Roche Applied Science    | 11088866001 |                               |
|                     | DNase I             | 100 U/ml      | Millipore Sigma          | D4527       |                               |
| E                   | Trypsin Type II-S   | 5 mg/ml       | Millipore Sigma          | T7409       | ++                            |
|                     | Dispase II          | 2 U/ml        | Roche Applied Science    | 4942078001  |                               |
|                     | Collagenase D       | 2 U/ml        | Roche Applied Science    | 11088866001 |                               |
|                     | DNase I             | 100 U/ml      | Millipore Sigma          | D4527       |                               |
| Digestion Buffer II | Trypsin             | 0.5%          | Thermo Fisher Scientific | 15090046    | +++                           |
|                     | Dispase II          | 2 U/ml        | Roche Applied Science    | 4942078001  |                               |
|                     | Collagenase D       | 2 U/ml        | Roche Applied Science    | 11088866001 |                               |
|                     | DNase I             | 10 U/ml       | Millipore Sigma          | D4527       |                               |
